# Supplementary material
Source: publisher figshare collection journal article supplement (https://plos.figshare.com/articles/dataset/_/6836993)
Supplement: Supplementary file 1 [file 1]

Archive with 7 entries (7 files):
- pone.0200747.s001.pdf
- pone.0200747.s002.pdf
- pone.0200747.s003.pdf
- pone.0200747.s004.pdf
- pone.0200747.s005.pdf
- pone.0200747.s006.pdf
- pone.0200747.s007.pdf
