# Supplementary material
Source: publisher figshare collection journal article supplement (https://plos.figshare.com/articles/dataset/_/6836993)
Supplement: Supplementary file 1 [file 1 › pone.0200747.s001.pdf]

S1 Table. Distribution of characteristics of 23,740 men and women in 1993–1997 by category of number of hospital admissions 1999–2009 †

|                                              | 0<br>(n=6,547 27.6%) | 1<br>(n=4,389 18.5%) | 2–3<br>(n=5,695 24.0%) | 4–6<br>(n=3,859 16.3%) | ≥7<br>(n=3,250 13.7%) |
|----------------------------------------------|----------------------|----------------------|------------------------|------------------------|-----------------------|
| <b>Alcohol intake, men, units per week</b>   |                      |                      |                        |                        |                       |
| Mean ±SD                                     | 11.2 ±12.1           | 10.4 ±11.6           | 10.1 ±11.9             | 9.5 ±11.9              | 9.4 ±11.7             |
| <b>Alcohol intake, women, units per week</b> |                      |                      |                        |                        |                       |
| Mean ±SD                                     | 5.0 ±6.0             | 4.8 ±5.9             | 4.2 ±5.6               | 4.0 ±5.4               | 3.6 ±5.1              |
| <b>Age, men, years</b>                       |                      |                      |                        |                        |                       |
| Mean ±SD                                     | 55.0 ±8.5            | 57.3 ±8.8            | 60.2 ±9.0              | 62.5 ±8.7              | 63.6 ±8.2             |
| <b>Age, women, years</b>                     |                      |                      |                        |                        |                       |
| Mean ±SD                                     | 55.5 ±8.5            | 56.9 ±8.9            | 59.4 ±9.2              | 61.9 ±9.0              | 62.0 ±9.0             |

† Includes day cases where admission and discharge are on the same day
