# Supplementary material
Source: publisher figshare collection journal article supplement (https://plos.figshare.com/articles/dataset/_/6836993)
Supplement: Supplementary file 1 [file 1 › pone.0200747.s002.pdf]

S2 Table. Distribution of characteristics of 23,740 men and women in 1993–1997 by category of total hospital days 1999–2009

|                                              | None<br>(n=6,547 27.6%) | Day case<br>(n=2,676 11.3%) | 1–4 nights<br>(n=4,707 19.8%) | 5–19 nights<br>(n=5,165 21.8%) | ≥20 nights<br>(n=4,645 19.6%) |
|----------------------------------------------|-------------------------|-----------------------------|-------------------------------|--------------------------------|-------------------------------|
| <b>Alcohol intake, men, units per week</b>   |                         |                             |                               |                                |                               |
| Mean ±SD                                     | 11.2 ±12.1              | 10.2 ±11.2                  | 10.5 ±11.9                    | 9.7 ±11.6                      | 9.4 ±12.2                     |
| <b>Alcohol intake, women, units per week</b> |                         |                             |                               |                                |                               |
| Mean ±SD                                     | 5.0 ±6.0                | 4.8 ±5.5                    | 4.5 ±6.0                      | 4.2 ±5.5                       | 3.5 ±5.1                      |
| <b>Age, men, years</b>                       |                         |                             |                               |                                |                               |
| Mean ±SD                                     | 55.0 ±8.5               | 56.1 ±8.2                   | 58.2 ±8.7                     | 60.9 ±8.7                      | 65.1 ±8.0                     |
| <b>Age, women, years</b>                     |                         |                             |                               |                                |                               |
| Mean ±SD                                     | 55.5 ±8.5               | 55.5 ±8.6                   | 57.7 ±8.8                     | 59.9 ±8.9                      | 64.4 ±8.5                     |
