# Supplementary material
Source: publisher figshare collection journal article supplement (https://plos.figshare.com/articles/dataset/_/6836993)
Supplement: Supplementary file 1 [file 1 › pone.0200747.s003.pdf]

S3 Table. Age adjusted and multivariable logistic regression of risk factors restricted to “detrimental” hospital admissions (those directly associated to alcohol intake in systematic reviews) for any hospital admissions (compared to none), ≥7 admissions (compared to <7 admissions) and >20 days of hospital stay (compared to ≤20 days) from 1999–2009 in 23,740 men and women aged 40–79 years 1993–1997

|                        | All   | n    | Any hospital admissions OR (95% CI) | p value | n   | Seven or more admissions OR (95% CI) | p value | n   | 20 or more hospital nights OR (95% CI) | p value |
|------------------------|-------|------|-------------------------------------|---------|-----|--------------------------------------|---------|-----|----------------------------------------|---------|
| <b>Men †</b>           |       |      |                                     |         |     |                                      |         |     |                                        |         |
| Current non-drinker    | 908   | 438  | 1                                   | –       | 34  | 1                                    | –       | 117 | 1                                      | –       |
| Current drinker        | 9975  | 3752 | 0.77 (0.67–0.89)                    | <0.001  | 298 | 0.92 (0.64–1.32)                     | 0.642   | 841 | 0.82 (0.66–1.01)                       | 0.063   |
| <b>Men ‡</b>           |       |      |                                     |         |     |                                      |         |     |                                        |         |
| Current non-drinker    | 908   | 438  | 1                                   | –       | 34  | 1                                    | –       | 117 | 1                                      | –       |
| Current drinker        | 9975  | 3752 | 0.78 (0.67–0.90)                    | <0.001  | 298 | 0.98 (0.67–1.43)                     | 0.926   | 841 | 0.85 (0.68–1.06)                       | 0.154   |
| <b>Men ‡</b>           |       |      |                                     |         |     |                                      |         |     |                                        |         |
| Current non-drinker    | 908   | 438  | 1                                   | –       | 34  | 1                                    | –       | 117 | 1                                      | –       |
| (0,7] units per week   | 4873  | 1891 | 0.78 (0.67–0.91)                    | 0.001   | 164 | 1.05 (0.71–1.55)                     | 0.813   | 432 | 0.83 (0.66–1.05)                       | 0.123   |
| (7,14] units per week  | 2346  | 855  | 0.75 (0.64–0.89)                    | <0.001  | 69  | 1.01 (0.65–1.56)                     | 0.966   | 187 | 0.82 (0.63–1.07)                       | 0.146   |
| (14,21] units per week | 1237  | 426  | 0.72 (0.60–0.87)                    | <0.001  | 26  | 0.74 (0.43–1.26)                     | 0.261   | 92  | 0.83 (0.61–1.12)                       | 0.221   |
| >21 units per week     | 1519  | 580  | 0.86 (0.72–1.03)                    | 0.099   | 39  | 0.87 (0.54–1.43)                     | 0.591   | 130 | 1.02 (0.76–1.35)                       | 0.913   |
| <b>Women †</b>         |       |      |                                     |         |     |                                      |         |     |                                        |         |
| Current non-drinker    | 1959  | 937  | 1                                   | –       | 65  | 1                                    | –       | 248 | 1                                      | –       |
| Current drinker        | 10898 | 3929 | 0.69 (0.62–0.76)                    | <0.001  | 262 | 0.76 (0.58–1.01)                     | 0.060   | 718 | 0.64 (0.54–0.74)                       | <0.001  |
| <b>Women ‡</b>         |       |      |                                     |         |     |                                      |         |     |                                        |         |
| Current non-drinker    | 1959  | 937  | 1                                   | –       | 65  | 1                                    | –       | 248 | 1                                      | –       |
| Current drinker        | 10898 | 3929 | 0.74 (0.67–0.82)                    | <0.001  | 262 | 0.85 (0.64–1.14)                     | 0.281   | 718 | 0.70 (0.59–0.83)                       | <0.001  |
| <b>Women ‡</b>         |       |      |                                     |         |     |                                      |         |     |                                        |         |
| Current non-drinker    | 1959  | 937  | 1                                   | –       | 65  | 1                                    | –       | 248 | 1                                      | –       |
| (0,7] units per week   | 8121  | 2993 | 0.75 (0.67–0.83)                    | <0.001  | 211 | 0.89 (0.66–1.20)                     | 0.437   | 571 | 0.72 (0.60–0.85)                       | <0.001  |
| (7,14] units per week  | 1911  | 652  | 0.72 (0.63–0.83)                    | <0.001  | 33  | 0.67 (0.43–1.04)                     | 0.076   | 91  | 0.57 (0.44–0.74)                       | <0.001  |
| (14,21] units per week | 615   | 200  | 0.67 (0.55–0.82)                    | <0.001  | 13  | 0.80 (0.43–1.49)                     | 0.482   | 36  | 0.67 (0.45–0.98)                       | 0.038   |
| >21 units per week     | 251   | 84   | 0.72 (0.54–0.96)                    | 0.024   | 5   | 0.75 (0.30–1.92)                     | 0.551   | 20  | 1.04 (0.62–1.73)                       | 0.893   |

OR = Odds ratio, CI = Confidence intervals. Comparison group: Current non-drinker †Adjusted for age ‡ Adjusted for age, smoking status, education level(low/others), social class (manual/non-manual), body mass index (continuous), prevalent heart disease or stroke, prevalent cancer and prevalent diabetes

Round brackets in intervals denote strict inequalities; square brackets denote non-strict inequalities

Restricted to hospital admissions with following ICD-10 codes: A15, A16, A17, A18, A19, B20, B21, B22, B23, B24, B90, C00, C01, C02, C03, C04, C05, C06, C07, C08, C09, C10, C11, C12, C13, C15, C18, C19, C20, C21, C22, C32, C33, C34, C50, D00, D01, D02, D03, D04, D05, D06, D07, D08, D09, D10, D11, D12, D13, D14, D15, D16, D17, D18, D19, D20, D21, D22, D23, D24, D25, D26, D27, D28, D29, D30, D31, D32, D33, D34, D35, D36, D37, D38, D39, D40, D41, D42, D43, D44, D45, D46, D47, D48, E24, F10, F32, F33, F34, G31, G40, G41, G62, G72, I11, I12, I13, I42, I47, I48, I60, I61, I62, I85, J09, J10, J11, J12, J13, J14, J15, J16, J17, J18, J19, J20, J21, J22, J85, K20, K21, K22, K28, K29, K30, K31, K38, K57, K58, K59, K60, K61, K62, K63, K70, K73, K74, K75, K76, K77, K80, K81, K82, K83, K85, K86, K90, K91, K92, L40, L41, O00, O01, O02, O03, O04, O05, O06, O07, O35, O08, P04, P05, P06, P07, P22, P25, P26, P27, P28, Q86, R78, T51, X45, X65, Y15, Y90, V01, V02, V03, V04, V09, V10, V11, V12, V13, V14, V15, V16, V17, V18, V19, V20, V21, V22, V23, V24, V25, V26, V27, V28, V29, V30, V31, V32, V33, V34, V35, V36, V37, V38, V39, V40, V41, V42, V43, V44, V45, V46, V47, V48, V49, V50, V51, V52, V53, V54, V55, V56, V57, V58, V59, V60, V61, V62, V63, V64, V65, V66, V67, V68, V69, V70, V71, V72, V73, V74, V75, V76, V77, V78, V79, V80, V81, V82, V83, V84, V85, V86, V87, V88, V89, V90, V91, V92, V93, V94, V95, V96, V97, V98, V99
