# Supplementary material
Source: publisher figshare collection journal article supplement (https://plos.figshare.com/articles/dataset/_/6836993)
Supplement: Supplementary file 1 [file 1 › pone.0200747.s004.pdf]

S4 Table. Age adjusted and multivariable logistic regression of risk factors restricted to “beneficial” hospital admissions (those inversely associated to alcohol intake in systematic reviews) for any hospital admissions (compared to none), ≥7 admissions (compared to <7 admissions) and >20 days of hospital stay (compared to ≤20 days) from 1999–2009 in 23,740 men and women aged 40–79 years 1993–1997

|                        | All   | n    | Any hospital admissions<br>OR (95% CI) | p value | n   | Seven or more admissions<br>OR (95% CI) | p value | n   | 20 or more hospital nights<br>OR (95% CI) | p value |
|------------------------|-------|------|----------------------------------------|---------|-----|-----------------------------------------|---------|-----|-------------------------------------------|---------|
| <b>Men †</b>           |       |      |                                        |         |     |                                         |         |     |                                           |         |
| Current non-drinker    | 908   | 318  | 1                                      | –       | 37  | 1                                       | –       | 117 | 1                                         | –       |
| Current drinker        | 9975  | 2433 | 0.75 (0.64–0.87)                       | <0.001  | 212 | 0.63 (0.44–0.91)                        | 0.013   | 742 | 0.73 (0.59–0.90)                          | 0.004   |
| <b>Men ‡</b>           |       |      |                                        |         |     |                                         |         |     |                                           |         |
| Current non-drinker    | 908   | 318  | 1                                      | –       | 37  | 1                                       | –       | 117 | 1                                         | –       |
| Current drinker        | 9975  | 2433 | 0.81 (0.69–0.96)                       | 0.013   | 212 | 0.77 (0.52–1.13)                        | 0.180   | 742 | 0.82 (0.65–1.03)                          | 0.091   |
| <b>Men ‡</b>           |       |      |                                        |         |     |                                         |         |     |                                           |         |
| Current non-drinker    | 908   | 318  | 1                                      | –       | 37  | 1                                       | –       | 117 | 1                                         | –       |
| (0,7] units per week   | 4873  | 1320 | 0.88 (0.74–1.04)                       | 0.135   | 119 | 0.79 (0.52–1.19)                        | 0.252   | 408 | 0.85 (0.66–1.08)                          | 0.177   |
| (7,14] units per week  | 2346  | 541  | 0.78 (0.64–0.94)                       | 0.010   | 45  | 0.76 (0.47–1.22)                        | 0.253   | 170 | 0.85 (0.64–1.12)                          | 0.239   |
| (14,21] units per week | 1237  | 256  | 0.70 (0.56–0.87)                       | 0.001   | 30  | 0.98 (0.57–1.67)                        | 0.936   | 79  | 0.75 (0.54–1.05)                          | 0.094   |
| >21 units per week     | 1519  | 316  | 0.71 (0.58–0.88)                       | 0.002   | 18  | 0.49 (0.27–0.91)                        | 0.022   | 85  | 0.70 (0.51–0.97)                          | 0.031   |
| <b>Women †</b>         |       |      |                                        |         |     |                                         |         |     |                                           |         |
| Current non-drinker    | 1959  | 525  | 1                                      | –       | 32  | 1                                       | –       | 180 | 1                                         | –       |
| Current drinker        | 10898 | 1615 | 0.60 (0.53–0.68)                       | <0.001  | 79  | 0.56 (0.37–0.86)                        | 0.008   | 428 | 0.57 (0.47–0.69)                          | <0.001  |
| <b>Women ‡</b>         |       |      |                                        |         |     |                                         |         |     |                                           |         |
| Current non-drinker    | 1959  | 525  | 1                                      | –       | 32  | 1                                       | –       | 180 | 1                                         | –       |
| Current drinker        | 10898 | 1615 | 0.67 (0.59–0.77)                       | <0.001  | 79  | 0.87 (0.55–1.37)                        | 0.543   | 428 | 0.66 (0.54–0.81)                          | <0.001  |
| <b>Women ‡</b>         |       |      |                                        |         |     |                                         |         |     |                                           |         |
| Current non-drinker    | 1959  | 525  | 1                                      | –       | 32  | 1                                       | –       | 180 | 1                                         | –       |
| (0,7] units per week   | 8121  | 1278 | 0.69 (0.60–0.78)                       | <0.001  | 67  | 0.89 (0.56–1.42)                        | 0.626   | 354 | 0.69 (0.56–0.85)                          | <0.001  |
| (7,14] units per week  | 1911  | 238  | 0.64 (0.53–0.77)                       | <0.001  | 9   | 0.79 (0.36–1.73)                        | 0.551   | 45  | 0.47 (0.33–0.67)                          | <0.001  |
| (14,21] units per week | 615   | 71   | 0.58 (0.43–0.77)                       | <0.001  | 1   | 0.30 (0.04–2.23)                        | 0.239   | 21  | 0.74 (0.46–1.21)                          | 0.237   |
| >21 units per week     | 251   | 28   | 0.60 (0.39–0.94)                       | 0.026   | 2   | 1.38 (0.31–6.17)                        | 0.677   | 8   | 0.79 (0.37–1.70)                          | 0.546   |

OR = Odds ratio, CI = Confidence intervals. Comparison group: Current non-drinker †Adjusted for age ‡ Adjusted for age, smoking status, education level (low/others), social class (manual/non-manual), body mass index (continuous), prevalent heart disease or stroke, prevalent cancer and prevalent diabetes

Round brackets in intervals denote strict inequalities; square brackets denote non-strict inequalities

Restricted to hospital admissions with following ICD-10 codes: E10, E11, E12, E13, F01, F02, F03, G30, G31, I20, I21, I22, I23, I24, I25, I63, I64, I65, I66, I67, K80, K81, K82, K83
