# Supplementary material
Source: publisher figshare collection journal article supplement (https://plos.figshare.com/articles/dataset/_/6836993)
Supplement: Supplementary file 1 [file 1 › pone.0200747.s005.pdf]

S5 Table. Sensitivity analysis for wine strength 1.8 units per glass. Age adjusted and multivariable logistic regression of risk factors for any hospital admissions (compared to none),  $\geq 7$  hospital admissions (compared to  $< 7$  admissions) and  $> 20$  days of hospital stay (compared to  $\leq 20$  days) from 1999–2009 in 23,740 men and women aged 40–79 years 1993–1997

|                        | All   | n    | Any hospital admissions<br>OR (95% CI) | p value   | n    | Seven or more admissions<br>OR (95% CI) | p value   | n    | 20 or more hospital nights<br>OR (95% CI) | p value   |
|------------------------|-------|------|----------------------------------------|-----------|------|-----------------------------------------|-----------|------|-------------------------------------------|-----------|
| <b>Men †</b>           |       |      |                                        |           |      |                                         |           |      |                                           |           |
| Current non-drinker    | 908   | 733  | 1                                      | –         | 186  | 1                                       | –         | 282  | 1                                         | –         |
| Current drinker        | 9975  | 7292 | 0.81 (0.68–0.97)                       | 0.021     | 1502 | 0.84 (0.71–1.00)                        | 0.052     | 2034 | 0.74 (0.63–0.87)                          | $< 0.001$ |
| <b>Men ‡</b>           |       |      |                                        |           |      |                                         |           |      |                                           |           |
| Current non-drinker    | 908   | 733  | 1                                      | –         | 186  | 1                                       | –         | 282  | 1                                         | –         |
| Current drinker        | 9975  | 7292 | 0.85 (0.71–1.02)                       | 0.083     | 1502 | 0.88 (0.73–1.05)                        | 0.162     | 2034 | 0.80 (0.68–0.94)                          | 0.008     |
| <b>Men §</b>           |       |      |                                        |           |      |                                         |           |      |                                           |           |
| Current non-drinker    | 908   | 733  | 1                                      | –         | 186  | 1                                       | –         | 282  | 1                                         | –         |
| (0,7] units per week   | 4466  | 3377 | 0.90 (0.74–1.09)                       | 0.271     | 728  | 0.91 (0.75–1.10)                        | 0.313     | 995  | 0.83 (0.69–0.98)                          | 0.032     |
| (7,14] units per week  | 2338  | 1695 | 0.83 (0.68–1.01)                       | 0.068     | 348  | 0.87 (0.71–1.08)                        | 0.200     | 458  | 0.75 (0.62–0.91)                          | 0.004     |
| (14,21] units per week | 1321  | 946  | 0.86 (0.69–1.07)                       | 0.175     | 182  | 0.85 (0.67–1.08)                        | 0.195     | 240  | 0.76 (0.61–0.95)                          | 0.016     |
| $> 21$ units per week  | 1850  | 1274 | 0.76 (0.62–0.93)                       | 0.009     | 244  | 0.82 (0.65–1.02)                        | 0.077     | 341  | 0.81 (0.66–0.99)                          | 0.039     |
| <b>Women †</b>         |       |      |                                        |           |      |                                         |           |      |                                           |           |
| Current non-drinker    | 1959  | 1534 | 1                                      | –         | 343  | 1                                       | –         | 548  | 1                                         | –         |
| Current drinker        | 10898 | 7634 | 0.77 (0.69–0.87)                       | $< 0.001$ | 1219 | 0.69 (0.61–0.79)                        | $< 0.001$ | 1781 | 0.65 (0.57–0.73)                          | $< 0.001$ |
| <b>Women ‡</b>         |       |      |                                        |           |      |                                         |           |      |                                           |           |
| Current non-drinker    | 1959  | 1534 | 1                                      | –         | 343  | 1                                       | –         | 548  | 1                                         | –         |
| Current drinker        | 10898 | 7634 | 0.84 (0.74–0.95)                       | 0.005     | 1219 | 0.77 (0.66–0.88)                        | $< 0.001$ | 1781 | 0.70 (0.62–0.80)                          | $< 0.001$ |
| <b>Women §</b>         |       |      |                                        |           |      |                                         |           |      |                                           |           |
| Current non-drinker    | 1959  | 1534 | 1                                      | –         | 343  | 1                                       | –         | 548  | 1                                         | –         |
| (0,7] units per week   | 7463  | 5326 | 0.85 (0.75–0.96)                       | 0.010     | 899  | 0.79 (0.68–0.91)                        | 0.001     | 1330 | 0.74 (0.65–0.84)                          | $< 0.001$ |
| (7,14] units per week  | 2115  | 1465 | 0.88 (0.75–1.02)                       | 0.087     | 211  | 0.74 (0.61–0.90)                        | 0.002     | 288  | 0.62 (0.52–0.74)                          | $< 0.001$ |
| (14,21] units per week | 843   | 533  | 0.69 (0.57–0.83)                       | $< 0.001$ | 72   | 0.63 (0.47–0.83)                        | 0.001     | 109  | 0.63 (0.49–0.80)                          | $< 0.001$ |
| $> 21$ units per week  | 477   | 310  | 0.78 (0.62–0.98)                       | 0.035     | 37   | 0.59 (0.41–0.85)                        | 0.005     | 54   | 0.56 (0.40–0.77)                          | $< 0.001$ |

OR = Odds ratio, CI = Confidence intervals. Comparison group: Lifelong abstainer †Adjusted for age ‡ Adjusted for age, smoking status, education level (low/others), social class (manual/non-manual), body mass index (continuous), prevalent heart disease or stroke, prevalent cancer and prevalent diabetes Round brackets in intervals denote strict inequalities; square brackets denote non-strict inequalities
