# Supplementary material
Source: publisher figshare collection journal article supplement (https://plos.figshare.com/articles/dataset/_/6836993)
Supplement: Supplementary file 1 [file 1 › pone.0200747.s006.pdf]

S6 Table. Sensitivity analysis using multiple imputation using the random forest non-parametric algorithm. Age adjusted and multivariable logistic regression of risk factors for any hospital admissions (compared to none),  $\geq 7$  hospital admissions (compared to  $< 7$  admissions) and  $> 20$  days of hospital stay (compared to  $\leq 20$  days) from 1999–2009 in 25,639 men and women aged 40–79 years 1993–1997

|                        | All   | n    | Any hospital admissions OR (95% CI) | p value   | n    | Seven or more admissions OR (95% CI) | p value   | n    | 20 or more hospital nights OR (95% CI) | p value   |
|------------------------|-------|------|-------------------------------------|-----------|------|--------------------------------------|-----------|------|----------------------------------------|-----------|
| <b>Men †</b>           |       |      |                                     |           |      |                                      |           |      |                                        |           |
| Current non-drinker    | 1091  | 856  | 1                                   | –         | 211  | 1                                    | –         | 327  | 1                                      | –         |
| Current drinker        | 10516 | 7575 | 0.85 (0.73–0.99)                    | 0.039     | 1562 | 0.87 (0.74–1.03)                     | 0.097     | 2146 | 0.77 (0.66–0.89)                       | $< 0.001$ |
| <b>Men ‡</b>           |       |      |                                     |           |      |                                      |           |      |                                        |           |
| Current non-drinker    | 1091  | 856  | 1                                   | –         | 211  | 1                                    | –         | 327  | 1                                      | –         |
| Current drinker        | 10516 | 7575 | 0.91 (0.78–1.06)                    | 0.236     | 1562 | 0.93 (0.79–1.10)                     | 0.393     | 2146 | 0.83 (0.71–0.96)                       | 0.013     |
| <b>Men §</b>           |       |      |                                     |           |      |                                      |           |      |                                        |           |
| Current non-drinker    | 1091  | 856  | 1                                   | –         | 211  | 1                                    | –         | 327  | 1                                      | –         |
| (0,7] units per week   | 5211  | 3855 | 0.95 (0.80–1.11)                    | 0.501     | 824  | 0.95 (0.80–1.13)                     | 0.570     | 1141 | 0.84 (0.72–0.98)                       | 0.028     |
| (7,14] units per week  | 2432  | 1747 | 0.93 (0.78–1.11)                    | 0.400     | 345  | 0.91 (0.75–1.11)                     | 0.335     | 469  | 0.80 (0.67–0.95)                       | 0.012     |
| (14,21] units per week | 1285  | 890  | 0.86 (0.70–1.04)                    | 0.119     | 181  | 0.93 (0.74–1.17)                     | 0.553     | 238  | 0.81 (0.66–1.00)                       | 0.050     |
| $> 21$ units per week  | 1588  | 1083 | 0.81 (0.67–0.97)                    | 0.025     | 212  | 0.88 (0.70–1.09)                     | 0.233     | 298  | 0.84 (0.69–1.03)                       | 0.087     |
| <b>Women †</b>         |       |      |                                     |           |      |                                      |           |      |                                        |           |
| Current non-drinker    | 2372  | 1843 | 1                                   | –         | 402  | 1                                    | –         | 649  | 1                                      | –         |
| Current drinker        | 11660 | 8134 | 0.77 (0.69–0.86)                    | $< 0.001$ | 1313 | 0.71 (0.63–0.81)                     | $< 0.001$ | 1961 | 0.68 (0.61–0.75)                       | $< 0.001$ |
| <b>Women ‡</b>         |       |      |                                     |           |      |                                      |           |      |                                        |           |
| Current non-drinker    | 2372  | 1843 | 1                                   | –         | 402  | 1                                    | –         | 649  | 1                                      | –         |
| Current drinker        | 11660 | 8134 | 0.85 (0.76–0.94)                    | 0.002     | 1313 | 0.79 (0.70–0.90)                     | $< 0.001$ | 1961 | 0.75 (0.67–0.84)                       | $< 0.001$ |
| <b>Women §</b>         |       |      |                                     |           |      |                                      |           |      |                                        |           |
| Current non-drinker    | 2372  | 1843 | 1                                   | –         | 402  | 1                                    | –         | 649  | 1                                      | –         |
| (0,7] units per week   | 8747  | 6184 | 0.86 (0.77–0.96)                    | 0.006     | 1045 | 0.82 (0.72–0.93)                     | 0.003     | 1558 | 0.77 (0.69–0.86)                       | $< 0.001$ |
| (7,14] units per week  | 2001  | 1347 | 0.82 (0.72–0.95)                    | 0.007     | 186  | 0.70 (0.57–0.84)                     | $< 0.001$ | 270  | 0.64 (0.54–0.76)                       | $< 0.001$ |
| (14,21] units per week | 646   | 429  | 0.79 (0.65–0.96)                    | 0.018     | 60   | 0.68 (0.51–0.92)                     | 0.011     | 92   | 0.67 (0.52–0.86)                       | 0.002     |
| $> 21$ units per week  | 266   | 174  | 0.79 (0.60–1.04)                    | 0.096     | 22   | 0.60 (0.38–0.96)                     | 0.031     | 41   | 0.81 (0.56–1.17)                       | 0.255     |

OR = Odds ratio, CI = Confidence intervals. Comparison group: Lifelong abstainer †Adjusted for age ‡ Adjusted for age, smoking status, education level(low/others), social class (manual/non-manual), body mass index (continuous), prevalent heart disease or stroke, prevalent cancer and prevalent diabetes

Round brackets in intervals denote strict inequalities; square brackets denote non-strict inequalities

Variables used in the multiple imputation include: age, sex, social class, education level, smoking status, beer, wine, sherry, spirits (at present and at age 20 and 30), physical activity, prevalent disease, hospital admission and hospital days
