# Supplementary material
Source: publisher figshare collection journal article supplement (https://plos.figshare.com/articles/dataset/_/6836993)
Supplement: Supplementary file 1 [file 1 › pone.0200747.s007.pdf]

S7 Table. Sensitivity analysis excluding hospital events before April 2004. Age adjusted and multivariable logistic regression of risk factors for any hospital admissions (compared to none),  $\geq 7$  admissions (compared to  $< 7$  admissions) and  $> 20$  days of hospital stay (compared to  $\leq 20$  days) from 2004–2009 in 23,740 men and women aged 40–79 years 1993–1997

|                        | All   | n    | Any hospital admissions<br>OR (95% CI) | p value   | n   | Seven or more admissions<br>OR (95% CI) | p value | n   | 20 or more hospital nights<br>OR (95% CI) | p value   |
|------------------------|-------|------|----------------------------------------|-----------|-----|-----------------------------------------|---------|-----|-------------------------------------------|-----------|
| <b>Men †</b>           |       |      |                                        |           |     |                                         |         |     |                                           |           |
| Current non-drinker    | 908   | 490  | 1                                      | –         | 58  | 1                                       | –       | 118 | 1                                         | –         |
| Current drinker        | 9975  | 5154 | 1.03 (0.89–1.18)                       | 0.696     | 550 | 0.99 (0.75–1.31)                        | 0.948   | 980 | 0.95 (0.77–1.17)                          | 0.616     |
| <b>Men ‡</b>           |       |      |                                        |           |     |                                         |         |     |                                           |           |
| Current non-drinker    | 908   | 490  | 1                                      | –         | 58  | 1                                       | –       | 118 | 1                                         | –         |
| Current drinker        | 9975  | 5154 | 1.03 (0.90–1.19)                       | 0.648     | 550 | 1.01 (0.76–1.35)                        | 0.920   | 980 | 0.99 (0.80–1.23)                          | 0.932     |
| <b>Men ‡</b>           |       |      |                                        |           |     |                                         |         |     |                                           |           |
| Current non-drinker    | 908   | 490  | 1                                      | –         | 58  | 1                                       | –       | 118 | 1                                         | –         |
| (0,7] units per week   | 4873  | 2597 | 1.07 (0.92–1.24)                       | 0.400     | 295 | 1.08 (0.80–1.46)                        | 0.598   | 512 | 1.01 (0.81–1.27)                          | 0.918     |
| (7,14] units per week  | 2346  | 1215 | 1.05 (0.89–1.23)                       | 0.579     | 120 | 0.94 (0.67–1.31)                        | 0.715   | 227 | 0.99 (0.77–1.28)                          | 0.969     |
| (14,21] units per week | 1237  | 621  | 1.01 (0.85–1.21)                       | 0.895     | 59  | 0.91 (0.62–1.33)                        | 0.631   | 106 | 0.90 (0.67–1.21)                          | 0.477     |
| $> 21$ units per week  | 1519  | 721  | 0.92 (0.77–1.09)                       | 0.332     | 76  | 0.95 (0.66–1.37)                        | 0.795   | 135 | 0.97 (0.73–1.29)                          | 0.840     |
| <b>Women †</b>         |       |      |                                        |           |     |                                         |         |     |                                           |           |
| Current non-drinker    | 1959  | 1128 | 1                                      | –         | 94  | 1                                       | –       | 280 | 1                                         | –         |
| Current drinker        | 10898 | 5361 | 0.80 (0.73–0.89)                       | $< 0.001$ | 429 | 0.87 (0.69–1.10)                        | 0.250   | 889 | 0.69 (0.60–0.80)                          | $< 0.001$ |
| <b>Women ‡</b>         |       |      |                                        |           |     |                                         |         |     |                                           |           |
| Current non-drinker    | 1959  | 1128 | 1                                      | –         | 94  | 1                                       | –       | 280 | 1                                         | –         |
| Current drinker        | 10898 | 5361 | 0.86 (0.77–0.95)                       | 0.004     | 429 | 0.99 (0.78–1.27)                        | 0.956   | 889 | 0.76 (0.65–0.89)                          | $< 0.001$ |
| <b>Women ‡</b>         |       |      |                                        |           |     |                                         |         |     |                                           |           |
| Current non-drinker    | 1959  | 1128 | 1                                      | –         | 94  | 1                                       | –       | 280 | 1                                         | –         |
| (0,7] units per week   | 8121  | 4034 | 0.85 (0.77–0.95)                       | 0.003     | 325 | 0.99 (0.77–1.27)                        | 0.917   | 682 | 0.75 (0.64–0.89)                          | $< 0.001$ |
| (7,14] units per week  | 1911  | 917  | 0.87 (0.76–1.00)                       | 0.050     | 75  | 1.07 (0.77–1.49)                        | 0.682   | 132 | 0.71 (0.56–0.90)                          | 0.004     |
| (14,21] units per week | 615   | 295  | 0.88 (0.73–1.07)                       | 0.204     | 22  | 0.97 (0.59–1.57)                        | 0.891   | 55  | 0.93 (0.67–1.28)                          | 0.658     |
| $> 21$ units per week  | 251   | 115  | 0.83 (0.63–1.10)                       | 0.196     | 7   | 0.72 (0.33–1.59)                        | 0.418   | 20  | 0.82 (0.49–1.38)                          | 0.455     |

OR = Odds ratio, CI = Confidence intervals. Comparison group: Lifelong abstainer †Adjusted for age ‡ Adjusted for age, smoking status, education level (low/others), social class (manual/non-manual), body mass index (continuous), prevalent heart disease or stroke, prevalent cancer and prevalent diabetes

Round brackets in intervals denote strict inequalities; square brackets denote non-strict inequalities

Variables used in the multiple imputation include: age, sex, social class, education level, smoking status, beer, wine, sherry, spirits (at present and at age 20 and 30), physical activity, prevalent disease, hospital admission and hospital days
